# Supplementary material for: [2.2]Paracyclophane derivatives containing tetrathiafulvalene moieties
Source: publisher site journal article supplement (doi:10.3762/bjoc.11.207), 2015-10-15
Supplement: Additional file 1 [file 1860-5397-11-207-S1.pdf]

**Supporting Information**  
**for**  
**[2.2]Paracyclophane derivatives containing**  
**tetrathiafulvalene moieties**

Laura G. Sarbu<sup>1,2</sup>, Lucian G. Bahrin<sup>1,2</sup>, Peter G. Jones<sup>3</sup>, Lucian M. Birsa\*<sup>1,2</sup>, and  
Henning Hopf\*<sup>2</sup>

Address: <sup>1</sup>Department of Chemistry, “Al. I. Cuza” University of Iasi, 11 Carol I Bv., RO-700506 Iasi, Romania, <sup>2</sup>Institute of Organic Chemistry, Technical University of Braunschweig, Hagenring 30, D-38106 Braunschweig, Germany and <sup>3</sup>Institute of Inorganic and Analytical Chemistry, Technical University of Braunschweig, Hagenring 30, D-38106 Braunschweig

Email: Lucian M. Birsa\* - lbirsa@uaic.ro ; Henning Hopf - [h.hopf@tu-bs.de](mailto:h.hopf@tu-bs.de)

\* Corresponding author

**Detailed experimental procedures, supplementary spectroscopic  
and X-ray data**

**Table of Contents**

|                               |    |
|-------------------------------|----|
| A. Experimental section ..... | S2 |
| B. X-ray spectral data.....   | S8 |

## A. Experimental section

**General Remarks:** Melting points: Büchi 510, uncorrected. IR: Bruker Tensor 27 with ATR.  $^1\text{H}$  and  $^{13}\text{C}$  NMR: Bruker AV300 spectrometer with TMS as internal standard at room temperature. Chemical shifts are reported in ppm downfield from tetramethylsilane. MS: Finnigan MAT 90X, electron impact (EI). Elemental analyses: CE440 Elemental Analyser; the results were found to be in good agreement ( $\pm 0.30\%$ ) with the calculated values. All reagents were commercially available and used without further purification.

### 2-Bromo-1-([2.2]paracyclophan-4-yl)ethan-1-one (**2**)

To a solution of 4-acetyl[2.2]paracyclophane (**1**) [1] (4.67 g, 18.70 mmol) in dioxane (25 mL), a solution of the molecular complex  $\text{Br}_2\cdot\text{dioxane}$  (1 mL  $\text{Br}_2$ , 1.6 mL dioxane) in dioxane (10 mL) was added dropwise. The reaction mixture was left to react at rt for 30 min and then poured in water. The precipitate was filtered off, washed with water, dried and recrystallized from ethanol to provide compound **2** as a white solid, m.p. 115-116 °C (lit. 101-103 °C [2]); yield 81% (5.0 g); IR (KBr):  $\nu(\text{tilde}) = 2929, 2921, 2851, 1694, 1211, 993, 720, 630, 505 \text{ cm}^{-1}$ ;  $^1\text{H}$  NMR ( $\text{CDCl}_3$ , 300 MHz):  $\delta = 2.80\text{--}2.92$  (m, 1 H,  $\text{CH}_2$ ), 2.95–3.07 (m, 2 H,  $\text{CH}_2$ ), 3.11–3.28 (m, 4 H,  $\text{CH}_2$ ), 3.38–3.92 (m, 1 H,  $\text{CH}_2$ ), 4.15, 4.36 (ABq,  $^2J = 12.2 \text{ Hz}$ , 2 H,  $\text{CH}_2$ ), 6.38 (dd,  $^4J = 1.8 \text{ Hz}$ ,  $^3J = 7.9 \text{ Hz}$ , 1 H,  $\text{CH}_{\text{ar}}$ ), 6.53 (m, 4 H,  $\text{CH}_{\text{ar}}$ ), 6.69 (dd,  $^4J = 1.7 \text{ Hz}$ ,  $^3J = 7.9 \text{ Hz}$ , 1 H,  $\text{CH}_{\text{ar}}$ ), 6.95 ppm (d,  $^4J = 1.7 \text{ Hz}$ , 1 H,  $\text{CH}_{\text{ar}}$ );  $^{13}\text{C}$  NMR ( $\text{CDCl}_3$ , 75 MHz)  $\delta = 33.2$

---

1. Truesdale, E. A.; Cram, D. J. *J. Org. Chem.* **1980**, *45*, 3974-3981.

2. Mamyrbekova, Zh. A.; Soldatova, S. A.; Abelentsev, V. I.; Solov'eva, T. I.; Guryshv, V. N.; Soldatenkov, A. T. *Pharm. Chem. J.* **1994**, *28*, 198-202.

(CH<sub>2</sub>), 34.8 (CH<sub>2</sub>), 35.0 (CH<sub>2</sub>), 35.1 (CH<sub>2</sub>), 36.0 (CH<sub>2</sub>), 131.2 (CH), 132.3 (CH), 132.7 (CH), 132.8 (CH), 133.6 (CH), 134.6 (C), 136.6 (CH), 137.3 (CH), 139.1 (C), 140.0 (C), 141.1 (C), 142.9 (C), 192.7 ppm (s); MS (EI, 70 eV):  $m/z$  (%) = 310 (27) [M<sup>+</sup>+2] for <sup>81</sup>Br, 328 (28) [M<sup>+</sup>] for <sup>79</sup>Br, 249 (32), 145 (67), 104 (100).

## 2-([2.2]Paracyclophan-4-yl)-2-oxoethyl-*N,N*-dimethyldithiocarbamate (**4a**)

### General procedure

To a solution of 2-bromo-1-([2.2]paracyclophan-4-yl)ethan-1-one (**2**, 4.29 g, 13.04 mmol) in acetone (100 mL) a solution of sodium *N,N*-dimethyldithiocarbamate (**3a**, 2.24 g, 13.04 mmol) in acetone/water (40 mL, 1:1 v/v) was added. The reaction mixture was heated under reflux for 10 min, cooled to rt and then poured into water. The precipitate was filtered off, washed with water, dried, and recrystallized from ethanol to provide compound **4a**. Dithiocarbamates **4b** and **4c** were obtained under the same experimental conditions.

**Compound 4a:** Colorless solid; m.p. 143-144 °C; yield 81% (3.72 g); IR (KBr):  $\nu$ (tilde) = 2921, 2883, 2850, 1683, 1498, 1295, 978, 720, 633, 502 cm<sup>-1</sup>; <sup>1</sup>H NMR (CDCl<sub>3</sub>, 300 MHz):  $\delta$  = 2.77–2.89 (m, 1 H, CH<sub>2</sub>), 2.95–3.33 (m, 6 H, CH<sub>2</sub>), 3.50 (s, 3 H, CH<sub>3</sub>), 3.59 (s, 3 H, CH<sub>3</sub>), 3.77–3.88 (m, 1 H, CH<sub>2</sub>), 4.22, 5.01 (ABq, <sup>2</sup> $J$  = 17.2 Hz, 2 H, CH<sub>2</sub>), 6.41–6.45 (m, 1 H, CH<sub>ar</sub>), 6.48–6.60 (m, 4 H, CH<sub>ar</sub>), 6.70 (dd, <sup>4</sup> $J$  = 1.7 Hz, <sup>3</sup> $J$  = 7.8 Hz, 1 H, CH<sub>ar</sub>), 7.30 ppm (d, <sup>4</sup> $J$  = 1.7 Hz, 1 H, CH<sub>ar</sub>); <sup>13</sup>C NMR (CDCl<sub>3</sub>, 75 MHz):  $\delta$  = 34.9 (CH<sub>2</sub>), 35.0 (CH<sub>2</sub>), 35.1 (CH<sub>2</sub>), 35.9 (CH<sub>2</sub>), 41.7 (CH<sub>3</sub>), 45.8 (CH<sub>3</sub>), 46.7 (CH<sub>2</sub>), 131.5 (CH), 132.5 (CH), 132.6 (CH), 132.7 (CH), 134.0 (CH), 136.2 (C), 136.3 (CH), 136.9 (CH), 139.1 (C), 140.0 (C), 140.1 (C), 142.0 (C), 194.6 (C), 195.9 ppm (C); MS (EI, 70 eV):  $m/z$  (%) = 369 (23) [M<sup>+</sup>], 354 (5), 131 (9), 104 (12), 88 (100).

**Compound 4b:** Colorless solid; m.p. 104-105 °C; yield 80% (0.89 g); IR (KBr):  $\nu(\text{tilde}) = 2926, 2871, 1681, 1430, 1158, 955, 720, 632 \text{ cm}^{-1}$ ;  $^1\text{H NMR}$  ( $\text{CDCl}_3$ , 300 MHz):  $\delta = 1.85\text{--}2.19$  (m, 4 H,  $\text{CH}_2$ ),  $2.70\text{--}3.40$  (m, 8 H,  $\text{CH}_2$ ),  $3.61\text{--}4.03$  (m, 4 H,  $\text{CH}_2$ ), 4.22, 5.01 (ABq,  $^2J = 17.0 \text{ Hz}$ , 2 H,  $\text{CH}_2$ ),  $6.30\text{--}6.82$  ppm (m, 7 H,  $\text{CH}_{\text{ar}}$ );  $^{13}\text{C NMR}$  ( $\text{CDCl}_3$ , 75 MHz):  $\delta = 24.0$  ( $\text{CH}_2$ ), 25.8 ( $\text{CH}_2$ ), 34.5 ( $\text{CH}_2$ ), 34.7 ( $\text{CH}_2$ ), 34.8 ( $\text{CH}_2$ ), 35.5 ( $\text{CH}_2$ ), 45.4 ( $\text{CH}_2$ ), 50.4 ( $\text{CH}_2$ ), 55.0 ( $\text{CH}_2$ ), 131.1 (CH), 132.1 (CH), 132.3 (CH), 132.4 (CH), 133.6 (CH), 135.8 (C), 135.9 (CH), 136.5 (CH), 138.7 (C), 139.6 (C), 139.7 (C), 141.5 (C), 190.1 (C), 194.3 ppm (C); MS (EI, 70 eV):  $m/z$  (%) = 395 (20) [ $\text{M}^+$ ], 146 (21), 114 (100), 104 (33).

**Compound 4c:** White solid; m.p. 105-106 °C; yield 80% (0.56 g); IR 3011, 2925, 2853, 1688, 1425, 1228, 1112, 990, 723, 634, 540  $\text{cm}^{-1}$ ;  $^1\text{H NMR}$  ( $\text{CDCl}_3$ , 300 MHz)  $\delta$  2.77–2.90 (m, 1 H,  $\text{CH}_2$ ), 2.93–3.33 (m, 7 H,  $\text{CH}_2$ ), 3.77–3.85 (m, 4 H,  $\text{CH}_2$ ), 3.93–4.51 (m, 4 H,  $\text{CH}_2$ ), 4.27, 5.01 (ABq,  $^2J = 17.1 \text{ Hz}$ , 2 H,  $\text{CH}_2$ ), 6.42 (dd,  $^4J = 1.9 \text{ Hz}$ ,  $^3J = 8.6 \text{ Hz}$ , 1 H,  $\text{CH}_{\text{ar}}$ ); 6.48–6.58 (m, 4 H,  $\text{CH}_{\text{ar}}$ ); 6.70 (dd,  $^4J = 1.8 \text{ Hz}$ ;  $^3J = 7.8 \text{ Hz}$ , 1 H,  $\text{CH}_{\text{ar}}$ ); 7.26 (d,  $^4J = 1.8 \text{ Hz}$ , 1H,  $\text{CH}_{\text{ar}}$ ) ppm;  $^{13}\text{C NMR}$  ( $\text{CDCl}_3$ , 75 MHz)  $\delta$  35.0 ( $\text{CH}_2$ ), 35.1 (2x $\text{CH}_2$ ), 35.9 ( $\text{CH}_2$ ), 62.1 ( $\text{CH}_2$ ), 62.2 (3x $\text{CH}_2$ ), 46.0 ( $\text{CH}_2$ ), 131.4 (CH), 132.4 (CH), 132.7 (CH), 132.8 (CH), 133.9 (CH), 136.2 (C), 136.3 (CH), 136.9 (CH), 139.1 (C), 140.0 (C), 140.1 (C), 142.1 (C), 194.4 (C), 196.3 (s) ppm; MS (EI)  $m/z$  (%) 411 (25) [ $\text{M}^+$ ], 130 (100), 104 (24), 86 (30).

## **2-(*N,N*-Dimethylamino)-4-([2.2]paracyclophan-4-yl)-1,3-dithiol-2-ylium perchlorate (5a)**

### **General procedure**

To a mixture of 6 mL concentrated sulfuric acid and 18 mL glacial acetic acid, 2-([2.2]paracyclophan-4-yl)-2-oxoethyl-*N,N*-dimethyldithiocarbamate (**4a**, 2.74 g, 7.42

mmol) was added in small portions. The reaction mixture was heated at 80 °C for 10 min, cooled after which 3 mL of perchloric acid were added. The precipitate obtained after water addition (250 mL) was filtered, dried and recrystallized from ethanol to provide compound **5a**. 1,3-Dithiolium perchlorates **5b** and **5c** were obtained under the same experimental conditions.

**Compound 5a:** White solid; m.p. 260-261 °C; yield 63% (2.11 g); IR 3049, 2928, 1576, 1404, 1074, 720, 619, 512 cm<sup>-1</sup>; <sup>1</sup>H NMR (DMSO-*d*<sub>6</sub>, 300 MHz) δ 2.79–2.91 (m, 1 H, CH<sub>2</sub>), 2.96–3.13 (m, 6 H, CH<sub>2</sub>), 3.41–3.52 (m, 1 H, CH<sub>2</sub>), 3.56 (s, 3 H, CH<sub>3</sub>), 3.60 (s, 3 H, CH<sub>3</sub>), 6.55 (dd, <sup>4</sup>*J* = 1.5 Hz, <sup>3</sup>*J* = 7.8 Hz, 1 H, CH<sub>ar</sub>), 6.58–6.72 (m, 6 H, CH<sub>ar</sub>), 7.69 (s, 1 H, CH) ppm; <sup>13</sup>C NMR (DMSO-*d*<sub>6</sub>, 75 MHz) δ 33.5 (CH<sub>2</sub>), 34.1 (CH<sub>2</sub>), 34.2 (CH<sub>2</sub>), 34.6 (CH<sub>2</sub>), 46.6 (CH<sub>3</sub>), 47.6 (CH<sub>3</sub>), 120.8 (CH), 129.5 (CH), 129.7 (C), 131.9 (CH), 132.7 (CH), 132.9 (CH), 133.3 (CH), 134.9 (CH), 136.4 (CH), 138.0 (C), 138.7 (C), 138.8 (C), 139.4 (C), 141.0 (C), 187.0 (C) ppm; MS (ESI) *m/z* (%) 352 [M<sup>+</sup> - ClO<sub>4</sub>].

**Compound 5b:** White solid; m.p. 235-236 °C; yield 58% (0.62 g); IR 2931, 2857, 1579, 1439, 1257, 1077, 718, 620 cm<sup>-1</sup>; <sup>1</sup>H NMR (DMSO-*d*<sub>6</sub>, 300 MHz) δ 2.17–2.28 (m, 4 H, CH<sub>2</sub>), 2.76–2.91 (m, 1 H, CH<sub>2</sub>), 2.95–3.16 (m, 6 H, CH<sub>2</sub>), 3.38–3.55 (m, 1 H, CH<sub>2</sub>), 3.71–3.92 (m, 4 H, CH<sub>2</sub>), 6.55 (dd, <sup>4</sup>*J* = 1.5 Hz, <sup>3</sup>*J* = 7.8 Hz, 1 H, CH<sub>ar</sub>), 6.58–6.74 (m, 6 H, CH<sub>ar</sub>), 7.67 (s, 1 H, CH) ppm; <sup>13</sup>C NMR (DMSO-*d*<sub>6</sub>, 75 MHz) δ 26.1 (CH<sub>2</sub>), 26.2 (CH<sub>2</sub>), 33.5 (CH<sub>2</sub>), 34.1 (CH<sub>2</sub>), 34.2 (CH<sub>2</sub>), 34.6 (CH<sub>2</sub>), 56.4 (CH<sub>2</sub>), 57.3 (CH<sub>2</sub>), 120.6 (CH), 129.4 (CH), 129.7 (C), 131.9 (CH), 132.7 (CH), 132.9 (CH), 133.3 (CH), 134.9 (CH), 136.4 (CH), 138.0 (C), 138.4 (C), 138.8 (C), 139.4 (C), 141.0 (C), 181.3 (C) ppm; MS (ESI) *m/z* (%) 378 [M<sup>+</sup> - ClO<sub>4</sub>].

**Compound 5c:** White solid; m.p. 213-214 °C; yield 81% (0.24 g); IR 2918, 2849, 1576, 1431, 1258, 1077, 719, 620, 540 cm<sup>-1</sup>; <sup>1</sup>H NMR (DMSO-*d*<sub>6</sub>, 300 MHz) δ 2.80–2.93 (m, 1 H, CH<sub>2</sub>), 2.94–3.14 (m, 6 H, CH<sub>2</sub>), 3.40–3.50 (m, 1 H, CH<sub>2</sub>), 3.84–3.92 (m,

4 H, CH<sub>2</sub>), 3.92–4.00 (m, 4 H, CH<sub>2</sub>), 6.55 (dd, <sup>4</sup>J = 1.4 Hz, <sup>3</sup>J = 7.7 Hz, 1 H, CH<sub>ar</sub>), 6.57–6.74 (m, 6 H, CH<sub>ar</sub>), 7.71 (s, 1 H, CH) ppm; <sup>13</sup>C NMR (DMSO-*d*<sub>6</sub>, 75 MHz) δ 33.4 (CH<sub>2</sub>), 34.1 (CH<sub>2</sub>), 34.2 (CH<sub>2</sub>), 34.6 (CH<sub>2</sub>), 53.4 (CH<sub>2</sub>), 54.6 (CH<sub>2</sub>), 64.3 (2xCH<sub>2</sub>), 119.8 (CH), 129.4 (CH), 129.6 (C), 131.9 (CH), 132.7 (CH), 132.8 (CH), 133.3 (CH), 135.0 (CH), 136.4 (CH), 137.6 (C), 138.0 (C), 138.8 (C), 139.3 (C), 141.0 (C), 188.1 (s) ppm; MS (ESI) *m/z* (%) 394 [M<sup>+</sup> - ClO<sub>4</sub>].

#### 4-([2.2]Paracyclophan-4-yl)-1,3-dithiol-2-thione (6)

To a suspension of 2-(*N,N*-dimethylamino)-4-([2.2]paracyclophan-4-yl)-1,3-dithiol-2-ylidium perchlorate (**5a**, 2.18 g, 4.82 mmol) in ethanol (100 mL) Na<sub>2</sub>S·9H<sub>2</sub>O (2.32 g, 9.64 mmol) was added. The reaction mixture was allowed to react for 12 h at rt. The precipitate obtained after water addition (300 mL) was filtered, dried and purified by column chromatography using CH<sub>2</sub>Cl<sub>2</sub>/pentane (1:1) as eluent to provide compound **6** as a yellow solid. M.p. 137-138 °C; R<sub>f</sub> = 0.49; yield 41% (0.67 g); IR 2922, 2849, 1054, 799, 718, 645 cm<sup>-1</sup>; <sup>1</sup>H NMR (CDCl<sub>3</sub>, 300 MHz) δ 2.81–2.89 (m, 1 H, CH<sub>2</sub>), 2.89–3.09 (m, 6 H, CH<sub>2</sub>), 3.36–3.49 (m, 1 H, CH<sub>2</sub>), 6.32–6.38 (m, 2 H, CH<sub>ar</sub>), 6.48–6.58 (m, 4 H, CH<sub>ar</sub>), 6.61 (dd, <sup>4</sup>J = 1.8 Hz, <sup>3</sup>J = 7.9 Hz, 1 H, CH<sub>ar</sub>), 6.75 (s, 1 H, CH) ppm; <sup>13</sup>C NMR (CDCl<sub>3</sub>, 75 MHz) δ 33.8 (CH<sub>2</sub>), 34.6 (CH<sub>2</sub>), 34.7 (CH<sub>2</sub>), 35.0 (CH<sub>2</sub>), 124.3 (CH), 129.5 (CH), 130.9 (C), 131.7 (CH), 132.3 (CH), 132.5 (CH), 133.0 (CH), 134.2 (CH), 136.0 (CH), 137.5 (C), 138.9 (C), 139.2 (C), 140.4 (C), 146.2 (C), 212.7 (C) ppm; MS (EI) *m/z* (%) 340 (52) [M<sup>+</sup>], 264 (16), 160 (100), 104 (48).

#### Tetrathiafulvalenes 7

A mixture of 4-([2.2]paracyclophan-4-yl)-1,3-dithiol-2-thione (**6**, 0.150 g, 0.44 mmol) and trimethyl phosphite (0.52 mL, 4.4 mmol) was heated at 100 °C for 14 h. The reaction mixture was purified by column chromatography using CH<sub>2</sub>Cl<sub>2</sub>/pentane (1:1)

as eluent to provide tetrathiafulvalenes **7** as yellow solids. M.p. 137-138 °C;  $R_f$  = 0.60; yield 17% (0.023 g); IR 2922, 2889, 2850, 1587, 1499, 939, 720, 644  $\text{cm}^{-1}$ ;  $^1\text{H}$  NMR ( $\text{CDCl}_3$ , 300 MHz) selected data for the major isomer  $\delta$  2.96–3.10 (m, 14 H,  $\text{CH}_2$ ), 3.66 (m, 2 H,  $\text{CH}_2$ ), 6.29–6.63 (m, 14 H,  $\text{CH}_{\text{ar}}$ ), 6.79 (m, 2 H, CH) ppm;  $^{13}\text{C}$  NMR ( $\text{CDCl}_3$ , 75 MHz) selected data for the major isomer  $\delta$  35.1 ( $\text{CH}_2$ ), 35.2 ( $\text{CH}_2$ ), 35.4 ( $\text{CH}_2$ ), 35.5 ( $\text{CH}_2$ ), 132.3 ( $\text{CH}_2$ ), 132.4 ( $\text{CH}_2$ ), 132.6 ( $\text{CH}_2$ ), 132.7 ( $\text{CH}_2$ ), 133.1 ( $\text{CH}_2$ ), 135.9 (C), 136.0 (C), 139.3 (C), 139.4 (C), 139.5 (C), 139.6 (C) ppm; MS (EI)  $m/z$  (%) 616 (77) [ $\text{M}^+$ ], 583 (15), 160 (62), 128 (100), 104 (60).

## B. X-ray spectral data

### X-ray structure determinations

Crystal data are summarized in Table S1. Crystals were mounted in inert oil on glass fibers and transferred to the cold gas stream of an Oxford Diffraction Nova E diffractometer. Intensity measurements were performed using mirror-focussed CuK $\alpha$  radiation ( $\lambda = 1.54184 \text{ \AA}$ ). Absorption corrections were based on multi-scans. Structures were refined anisotropically on  $F^2$  using the program SHELXL-97 [3]. Hydrogen atoms were included using a riding model or rigid methyl groups. Compound **6** was not enantiomerically pure and crystallized only by chance in the chiral (Sohncke) space group  $P2_1$ ; the structure was refined as an enantiomeric twin, with a Flack parameter of 0.440(16).

---

3. Sheldrick, G. M. *Acta Cryst.* **2008**, *A64*, 112-122.



**Table S1:** Crystallographic data for **4a** and **6**

| Compound                                         | <b>4a</b>                                        | <b>6</b>                                       |
|--------------------------------------------------|--------------------------------------------------|------------------------------------------------|
| Formula                                          | C <sub>21</sub> H <sub>23</sub> NOS <sub>2</sub> | C <sub>19</sub> H <sub>16</sub> S <sub>3</sub> |
| <i>M<sub>r</sub></i>                             | 369.52                                           | 340.50                                         |
| Temperature (K)                                  | 100                                              | 100                                            |
| Crystal habit                                    | colourless plate                                 | yellow prism                                   |
| Crystal size (mm)                                | 0.1 × 0.1 × 0.015                                | 0.15 × 0.08 × 0.04                             |
| Crystal system                                   | orthorhombic                                     | Monoclinic                                     |
| Space group                                      | <i>Pbca</i>                                      | <i>P2<sub>1</sub></i>                          |
| Cell dimensions:                                 |                                                  |                                                |
| <i>a</i> (Å)                                     | 11.8026(7)                                       | 7.4723(3)                                      |
| <i>b</i> (Å)                                     | 8.2761(4)                                        | 23.1083(8)                                     |
| <i>c</i> (Å)                                     | 37.697(3)                                        | 9.2378(4)                                      |
| $\alpha$ (°)                                     | 90                                               | 90                                             |
| $\beta$ (°)                                      | 90                                               | 93.560(3)                                      |
| $\gamma$ (°)                                     | 90                                               | 90                                             |
| Cell volume (Å <sup>3</sup> )                    | 3682.2                                           | 1592.04                                        |
| <i>Z</i>                                         | 8                                                | 4                                              |
| <i>D<sub>x</sub></i> (g cm <sup>-3</sup> )       | 1.333                                            | 1.421                                          |
| $\mu$ (mm <sup>-1</sup> )                        | 2.68                                             | 4.18                                           |
| 2 $\theta$ (max) (°)                             | 155.2                                            | 151.2                                          |
| Reflections collected                            | 75990                                            | 32381                                          |
| Independent reflections                          | 3833                                             | 6557                                           |
| R(int)                                           | 0.078                                            | 0.043                                          |
| Transmissions                                    | 0.607 - 1.000                                    | 0.630 - 1.000                                  |
| Data/restraints/parameters                       | 3833/0/228                                       | 6557/1/398                                     |
| Goodness-of-fit on <i>F</i> <sup>2</sup>         | 1.09                                             | 1.07                                           |
| <i>wR</i> 2 (all reflections)                    | 0.116                                            | 0.121                                          |
| <i>R</i> 1 ( <i>F</i> > 4 $\sigma$ ( <i>F</i> )) | 0.048                                            | 0.045                                          |
| Max. $\Delta\rho$ (e Å <sup>-3</sup> )           | 0.62                                             | 0.70                                           |

**B1. X-ray data for 2-([2.2]paracyclophan-4-yl)-2-oxoethyl-*N,N*-dimethyldithiocarbamate (4a)**

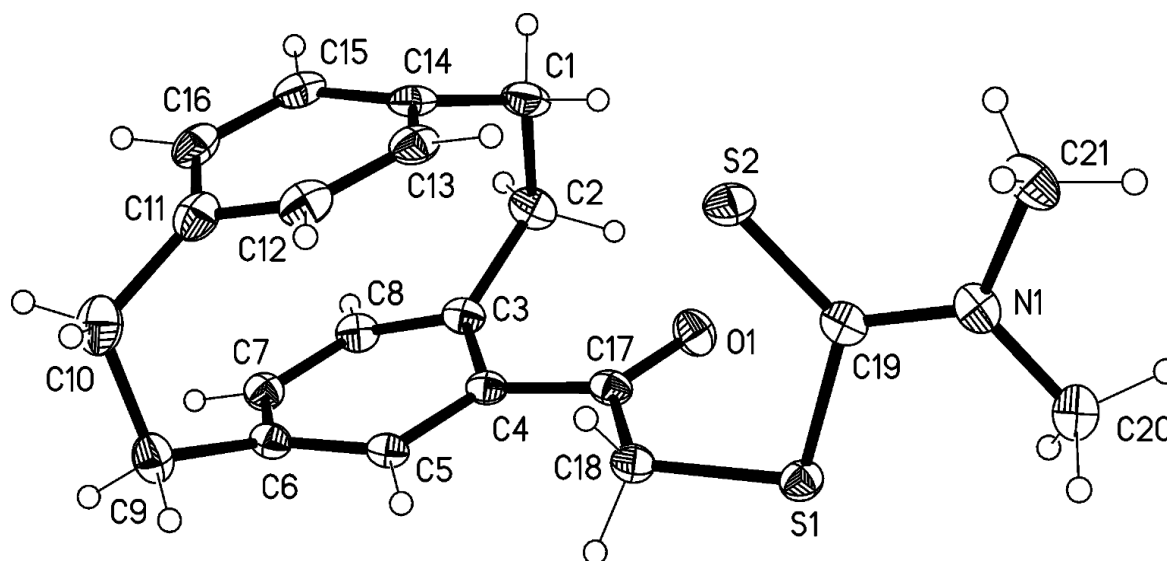

**Table S2:** Crystal data and structure refinement.

|                                   |                                                  |         |
|-----------------------------------|--------------------------------------------------|---------|
| Identification code               | perc                                             |         |
| Empirical formula                 | C <sub>21</sub> H <sub>23</sub> NOS <sub>2</sub> |         |
| Formula weight                    | 369.52                                           |         |
| Temperature                       | 100(2) K                                         |         |
| Wavelength                        | 1.54184 Å                                        |         |
| Crystal system                    | Orthorhombic                                     |         |
| Space group                       | Pbca                                             |         |
| Unit cell dimensions              | a = 11.8026(7) Å                                 | α = 90° |
|                                   | b = 8.2761(4) Å                                  | β = 90° |
|                                   | c = 37.697(3) Å                                  | γ = 90° |
| Volume                            | 3682.2(4) Å <sup>3</sup>                         |         |
| Z                                 | 8                                                |         |
| Density (calculated)              | 1.333 Mg/m <sup>3</sup>                          |         |
| Absorption coefficient            | 2.677 mm <sup>-1</sup>                           |         |
| F(000)                            | 1568                                             |         |
| Crystal size                      | 0.10 x 0.10 x 0.02 mm <sup>3</sup>               |         |
| Theta range for data collection   | 4.42 to 77.61°                                   |         |
| Index ranges                      | -14 ≤ h ≤ 14, -9 ≤ k ≤ 10, -46 ≤ l ≤ 47          |         |
| Reflections collected             | 75990                                            |         |
| Independent reflections           | 3833 [R(int) = 0.0781]                           |         |
| Completeness to theta = 75.00°    | 100.0 %                                          |         |
| Absorption correction             | Semi-empirical from equivalents                  |         |
| Max. and min. transmission        | 1.00000 and 0.60742                              |         |
| Refinement method                 | Full-matrix least-squares on F <sup>2</sup>      |         |
| Data / restraints / parameters    | 3833 / 0 / 228                                   |         |
| Goodness-of-fit on F <sup>2</sup> | 1.090                                            |         |
| Final R indices [I > 2σ(I)]       | R1 = 0.0478, wR2 = 0.1116                        |         |
| R indices (all data)              | R1 = 0.0548, wR2 = 0.1162                        |         |
| Largest diff. peak and hole       | 0.618 and -0.387 e.Å <sup>-3</sup>               |         |

**Table S3:** Atomic coordinates (  $\times 10^4$ ) and equivalent isotropic displacement parameters ( $\text{\AA}^2 \times 10^3$ ).  $U(\text{eq})$  is defined as one third of the trace of the orthogonalized  $U_{ij}$  tensor.

|       | x          | y          | z         | U(eq)   |
|-------|------------|------------|-----------|---------|
| S(1)  | 2938.6(5)  | 814.7(6)   | 500.2(1)  | 31.4(1) |
| S(2)  | 4769.9(5)  | -1147.2(7) | 858.8(2)  | 37.5(2) |
| O(1)  | 4721.2(14) | 3127(2)    | 684.1(4)  | 39.3(4) |
| N(1)  | 4089.5(17) | -1500(2)   | 193.0(5)  | 33.8(4) |
| C(1)  | 6822.5(19) | 3332(3)    | 1226.2(7) | 43.0(6) |
| C(2)  | 6211.5(19) | 4933(3)    | 1110.0(7) | 39.1(5) |
| C(3)  | 5075.9(18) | 5137(3)    | 1291.5(6) | 30.1(4) |
| C(4)  | 4148.3(17) | 4080(2)    | 1249.4(6) | 26.9(4) |
| C(5)  | 3385.8(17) | 3887(3)    | 1532.5(6) | 28.5(4) |
| C(6)  | 3515.4(18) | 4732(3)    | 1849.3(6) | 31.0(5) |
| C(7)  | 4266.0(19) | 6025(3)    | 1850.2(6) | 32.7(5) |
| C(8)  | 5027.4(19) | 6224(3)    | 1575.4(6) | 33.1(5) |
| C(9)  | 3066(2)    | 4042(3)    | 2192.6(6) | 40.5(5) |
| C(10) | 3967(3)    | 2986(3)    | 2398.6(7) | 48.1(6) |
| C(11) | 4980(2)    | 2549(3)    | 2173.2(6) | 39.7(5) |
| C(12) | 4931(2)    | 1399(3)    | 1903.4(7) | 39.2(5) |
| C(13) | 5654(2)    | 1498(3)    | 1613.7(7) | 37.7(5) |
| C(14) | 6446.9(18) | 2747(3)    | 1586.2(7) | 36.9(5) |
| C(15) | 6659(2)    | 3643(3)    | 1893.1(7) | 41.1(6) |
| C(16) | 5925(2)    | 3544(3)    | 2179.8(7) | 41.3(6) |
| C(17) | 4058.7(18) | 3024(3)    | 931.3(6)  | 29.6(4) |
| C(18) | 3105.3(18) | 1782(3)    | 921.6(6)  | 30.8(4) |
| C(19) | 3999.6(18) | -700(3)    | 500.9(6)  | 30.1(4) |
| C(20) | 3403(2)    | -1130(3)   | -118.3(6) | 39.7(5) |
| C(21) | 4837(2)    | -2917(3)   | 167.9(7)  | 43.7(6) |

**Table S4:** Bond lengths [Å] and angles [°].

---

|                  |            |                   |            |
|------------------|------------|-------------------|------------|
| S(1)-C(19)       | 1.772(2)   | C(5)-C(6)         | 1.393(3)   |
| S(1)-C(18)       | 1.790(2)   | C(6)-C(7)         | 1.389(3)   |
| S(2)-C(19)       | 1.669(2)   | C(6)-C(9)         | 1.511(3)   |
| O(1)-C(17)       | 1.219(3)   | C(7)-C(8)         | 1.381(3)   |
| N(1)-C(19)       | 1.341(3)   | C(9)-C(10)        | 1.581(4)   |
| N(1)-C(20)       | 1.458(3)   | C(10)-C(11)       | 1.511(4)   |
| N(1)-C(21)       | 1.471(3)   | C(11)-C(16)       | 1.387(4)   |
| C(1)-C(14)       | 1.508(4)   | C(11)-C(12)       | 1.394(4)   |
| C(1)-C(2)        | 1.570(4)   | C(12)-C(13)       | 1.388(4)   |
| C(2)-C(3)        | 1.514(3)   | C(13)-C(14)       | 1.398(3)   |
| C(3)-C(8)        | 1.399(3)   | C(14)-C(15)       | 1.397(3)   |
| C(3)-C(4)        | 1.410(3)   | C(15)-C(16)       | 1.387(4)   |
| C(4)-C(5)        | 1.405(3)   | C(17)-C(18)       | 1.524(3)   |
| C(4)-C(17)       | 1.488(3)   |                   |            |
| <hr/>            |            |                   |            |
| C(19)-S(1)-C(18) | 103.75(10) | C(11)-C(10)-C(9)  | 112.9(2)   |
| C(19)-N(1)-C(20) | 123.27(19) | C(16)-C(11)-C(12) | 116.9(2)   |
| C(19)-N(1)-C(21) | 119.8(2)   | C(16)-C(11)-C(10) | 119.0(2)   |
| C(20)-N(1)-C(21) | 116.7(2)   | C(12)-C(11)-C(10) | 122.8(2)   |
| C(14)-C(1)-C(2)  | 112.8(2)   | C(13)-C(12)-C(11) | 120.6(2)   |
| C(3)-C(2)-C(1)   | 111.99(19) | C(12)-C(13)-C(14) | 120.9(2)   |
| C(8)-C(3)-C(4)   | 116.9(2)   | C(15)-C(14)-C(13) | 116.8(2)   |
| C(8)-C(3)-C(2)   | 117.0(2)   | C(15)-C(14)-C(1)  | 121.5(2)   |
| C(4)-C(3)-C(2)   | 124.5(2)   | C(13)-C(14)-C(1)  | 120.1(2)   |
| C(5)-C(4)-C(3)   | 118.8(2)   | C(16)-C(15)-C(14) | 120.2(2)   |
| C(5)-C(4)-C(17)  | 119.98(19) | C(11)-C(16)-C(15) | 121.5(2)   |
| C(3)-C(4)-C(17)  | 120.68(19) | O(1)-C(17)-C(4)   | 122.0(2)   |
| C(6)-C(5)-C(4)   | 121.6(2)   | O(1)-C(17)-C(18)  | 120.1(2)   |
| C(7)-C(6)-C(5)   | 117.3(2)   | C(4)-C(17)-C(18)  | 117.89(18) |
| C(7)-C(6)-C(9)   | 120.9(2)   | C(17)-C(18)-S(1)  | 113.83(15) |
| C(5)-C(6)-C(9)   | 120.4(2)   | N(1)-C(19)-S(2)   | 123.19(17) |
| C(8)-C(7)-C(6)   | 120.3(2)   | N(1)-C(19)-S(1)   | 113.85(17) |
| C(7)-C(8)-C(3)   | 121.6(2)   | S(2)-C(19)-S(1)   | 122.89(13) |
| C(6)-C(9)-C(10)  | 113.2(2)   |                   |            |

---

**Table S5:** Torsion angles [°].

|                         |            |                        |             |
|-------------------------|------------|------------------------|-------------|
| C(14)-C(1)-C(2)-C(3)    | -24.8(3)   | O(1)-C(17)-C(18)-S(1)  | -9.9(3)     |
| C(1)-C(2)-C(3)-C(8)     | 102.4(2)   | C(4)-C(17)-C(18)-S(1)  | 170.39(15)  |
| C(1)-C(2)-C(3)-C(4)     | -62.9(3)   | C(19)-S(1)-C(18)-C(17) | 80.88(16)   |
| C(8)-C(3)-C(4)-C(5)     | -15.5(3)   | C(20)-N(1)-C(19)-S(2)  | 178.90(17)  |
| C(2)-C(3)-C(4)-C(5)     | 149.8(2)   | C(21)-N(1)-C(19)-S(2)  | 4.4(3)      |
| C(8)-C(3)-C(4)-C(17)    | 172.52(19) | C(20)-N(1)-C(19)-S(1)  | 1.8(3)      |
| C(2)-C(3)-C(4)-C(17)    | -22.1(3)   | C(21)-N(1)-C(19)-S(1)  | -172.69(16) |
| C(3)-C(4)-C(5)-C(6)     | 1.1(3)     | C(18)-S(1)-C(19)-N(1)  | -174.77(16) |
| C(17)-C(4)-C(5)-C(6)    | 173.13(19) | C(18)-S(1)-C(19)-S(2)  | 8.12(16)    |
| C(4)-C(5)-C(6)-C(7)     | 13.8(3)    |                        |             |
| C(4)-C(5)-C(6)-C(9)     | -152.8(2)  |                        |             |
| C(5)-C(6)-C(7)-C(8)     | -14.1(3)   |                        |             |
| C(9)-C(6)-C(7)-C(8)     | 152.4(2)   |                        |             |
| C(6)-C(7)-C(8)-C(3)     | -0.5(3)    |                        |             |
| C(4)-C(3)-C(8)-C(7)     | 15.5(3)    |                        |             |
| C(2)-C(3)-C(8)-C(7)     | -151.0(2)  |                        |             |
| C(7)-C(6)-C(9)-C(10)    | -74.9(3)   |                        |             |
| C(5)-C(6)-C(9)-C(10)    | 91.3(3)    |                        |             |
| C(6)-C(9)-C(10)-C(11)   | -13.9(3)   |                        |             |
| C(9)-C(10)-C(11)-C(16)  | 92.4(3)    |                        |             |
| C(9)-C(10)-C(11)-C(12)  | -73.6(3)   |                        |             |
| C(16)-C(11)-C(12)-C(13) | -14.2(3)   |                        |             |
| C(10)-C(11)-C(12)-C(13) | 152.0(2)   |                        |             |
| C(11)-C(12)-C(13)-C(14) | 0.2(3)     |                        |             |
| C(12)-C(13)-C(14)-C(15) | 14.4(3)    |                        |             |
| C(12)-C(13)-C(14)-C(1)  | -151.2(2)  |                        |             |
| C(2)-C(1)-C(14)-C(15)   | -64.6(3)   |                        |             |
| C(2)-C(1)-C(14)-C(13)   | 100.3(3)   |                        |             |
| C(13)-C(14)-C(15)-C(16) | -15.0(3)   |                        |             |
| C(1)-C(14)-C(15)-C(16)  | 150.4(2)   |                        |             |
| C(12)-C(11)-C(16)-C(15) | 13.7(3)    |                        |             |
| C(10)-C(11)-C(16)-C(15) | -153.1(2)  |                        |             |
| C(14)-C(15)-C(16)-C(11) | 0.9(4)     |                        |             |
| C(5)-C(4)-C(17)-O(1)    | -178.2(2)  |                        |             |
| C(3)-C(4)-C(17)-O(1)    | -6.3(3)    |                        |             |
| C(5)-C(4)-C(17)-C(18)   | 1.6(3)     |                        |             |
| C(3)-C(4)-C(17)-C(18)   | 173.48(18) |                        |             |

## B2. X-ray data for 4-([2.2]paracyclophan-4-yl)-1,3-dithiol-2-thione (6)

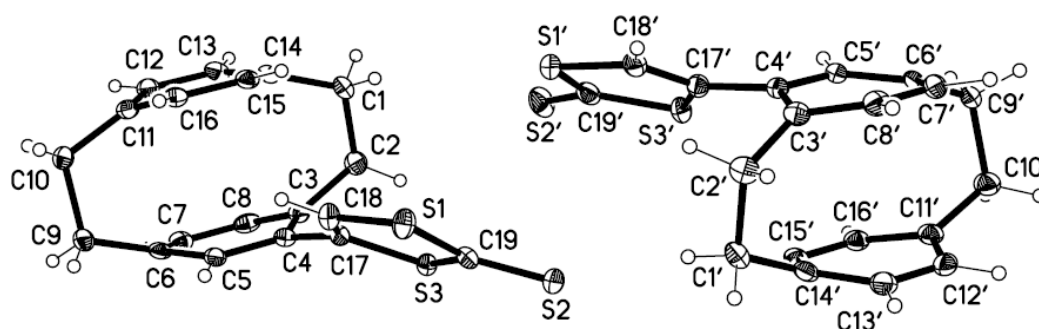

**Table S6:** Crystal data and structure refinement.

|                                   |                                             |                           |
|-----------------------------------|---------------------------------------------|---------------------------|
| Identification code               | dekel                                       |                           |
| Empirical formula                 | $C_{19}H_{16}S_3$                           |                           |
| Formula weight                    | 340.50                                      |                           |
| Temperature                       | 100(2) K                                    |                           |
| Wavelength                        | 1.54184 Å                                   |                           |
| Crystal system                    | Monoclinic                                  |                           |
| Space group                       | $P2_1$                                      |                           |
| Unit cell dimensions              | $a = 7.4723(3)$ Å                           | $\alpha = 90^\circ$       |
|                                   | $b = 23.1083(8)$ Å                          | $\beta = 93.560(3)^\circ$ |
|                                   | $c = 9.2378(4)$ Å                           | $\gamma = 90^\circ$       |
| Volume                            | $1592.04(11)$ Å <sup>3</sup>                |                           |
| Z                                 | 4                                           |                           |
| Density (calculated)              | 1.421 Mg/m <sup>3</sup>                     |                           |
| Absorption coefficient            | 4.178 mm <sup>-1</sup>                      |                           |
| F(000)                            | 712                                         |                           |
| Crystal size                      | 0.15 x 0.08 x 0.04 mm <sup>3</sup>          |                           |
| Theta range for data collection   | 3.83 to 75.60°                              |                           |
| Index ranges                      | -9 ≤ h ≤ 8, -28 ≤ k ≤ 28, -11 ≤ l ≤ 11      |                           |
| Reflections collected             | 32381                                       |                           |
| Independent reflections           | 6557 [R(int) = 0.0429]                      |                           |
| Completeness to theta = 75.00°    | 99.8 %                                      |                           |
| Absorption correction             | Semi-empirical from equivalents             |                           |
| Max. and min. transmission        | 1.00000 and 0.62972                         |                           |
| Refinement method                 | Full-matrix least-squares on F <sup>2</sup> |                           |
| Data / restraints / parameters    | 6557 / 1 / 398                              |                           |
| Goodness-of-fit on F <sup>2</sup> | 1.071                                       |                           |
| Final R indices [I > 2σ(I)]       | R1 = 0.0450, wR2 = 0.1203                   |                           |
| R indices (all data)              | R1 = 0.0457, wR2 = 0.1208                   |                           |
| Absolute structure parameter      | 0.440(16)                                   |                           |
| Largest diff. peak and hole       | 0.696 and -0.410 e.Å <sup>-3</sup>          |                           |

**Table S7:** Atomic coordinates ( $\times 10^4$ ) and equivalent isotropic displacement parameters ( $\text{\AA}^2 \times 10^3$ ). U(eq) is defined as one third of the trace of the orthogonalized  $U_{ij}$  tensor.

|       | x           | y          | z          | U(eq)   |
|-------|-------------|------------|------------|---------|
| S(1)  | 7667.7(12)  | 4795.7(4)  | 4645.2(10) | 35.8(2) |
| S(2)  | 6709.8(13)  | 5472.1(4)  | 7242.1(10) | 39.5(2) |
| S(3)  | 4289.7(10)  | 4581.0(3)  | 5856.6(8)  | 28.7(2) |
| C(1)  | 4633(5)     | 2790.9(18) | 6002(4)    | 36.2(8) |
| C(2)  | 2948(5)     | 3200.6(16) | 6006(4)    | 33.8(7) |
| C(3)  | 2311(4)     | 3406.8(14) | 4496(3)    | 26.7(6) |
| C(4)  | 3301(4)     | 3789.9(14) | 3656(4)    | 25.8(6) |
| C(5)  | 3127(4)     | 3760.9(14) | 2143(4)    | 27.7(6) |
| C(6)  | 2024(4)     | 3350.2(14) | 1424(4)    | 28.6(7) |
| C(7)  | 776(4)      | 3069.5(15) | 2253(4)    | 32.9(7) |
| C(8)  | 929(4)      | 3097.1(15) | 3748(4)    | 34.3(7) |
| C(9)  | 2421(5)     | 3140.9(15) | -60(4)     | 33.1(7) |
| C(10) | 3755(5)     | 2604.9(15) | -25(4)     | 32.4(7) |
| C(11) | 4497(4)     | 2456.5(14) | 1489(4)    | 28.9(7) |
| C(12) | 3556(5)     | 2086.8(15) | 2362(4)    | 31.0(7) |
| C(13) | 3777(5)     | 2133.4(15) | 3870(4)    | 32.0(7) |
| C(14) | 4932(5)     | 2544.7(15) | 4519(4)    | 29.9(7) |
| C(15) | 6131(4)     | 2813.5(14) | 3645(4)    | 29.3(7) |
| C(16) | 5916(4)     | 2769.2(15) | 2138(4)    | 28.4(6) |
| C(17) | 4698(4)     | 4178.4(13) | 4311(3)    | 25.8(6) |
| C(18) | 6288(5)     | 4291.5(16) | 3777(4)    | 31.8(7) |
| C(19) | 6253(5)     | 4978.5(15) | 6012(4)    | 31.2(7) |
| S(1') | 10343.1(13) | 4310.1(4)  | 8064.9(9)  | 37.7(2) |
| S(2') | 6837.6(16)  | 3879.0(5)  | 9032.9(12) | 49.0(3) |
| S(3') | 9073.4(11)  | 4739.7(4)  | 10733.2(8) | 30.3(2) |
| C(1') | 11040(5)    | 6443.4(17) | 9103(4)    | 34.4(7) |
| C(2') | 12889(5)    | 6114.4(16) | 9297(4)    | 34.9(7) |
| C(3') | 13214(4)    | 5842.0(15) | 10779(4)   | 28.4(7) |
| C(4') | 12181(4)    | 5384.7(14) | 11304(3)   | 25.9(6) |
| C(5') | 11944(4)    | 5348.4(14) | 12789(3)   | 24.8(6) |
| C(6') | 12735(4)    | 5746.4(14) | 13769(3)   | 25.6(6) |
| C(7') | 14066(4)    | 6095.2(16) | 13280(4)   | 32.6(7) |
| C(8') | 14296(4)    | 6141.7(16) | 11807(4)   | 33.2(7) |
| C(9') | 11908(5)    | 5869.6(15) | 15201(4)   | 30.8(7) |

|        |          |            |          |         |
|--------|----------|------------|----------|---------|
| C(10') | 10613(5) | 6414.0(18) | 15115(4) | 38.3(8) |
| C(11') | 10114(4) | 6601.4(15) | 13577(4) | 31.3(7) |
| C(12') | 11084(5) | 7030.6(15) | 12914(4) | 32.9(7) |
| C(13') | 11213(5) | 7044.9(15) | 11421(4) | 33.9(7) |
| C(14') | 10354(4) | 6624.9(15) | 10547(4) | 29.6(7) |
| C(15') | 9043(4)  | 6284.4(14) | 11185(4) | 29.4(7) |
| C(16') | 8926(4)  | 6272.2(14) | 12671(4) | 30.3(7) |
| C(17') | 11188(4) | 4987.3(14) | 10300(3) | 27.0(6) |
| C(18') | 11758(5) | 4775.6(17) | 9052(3)  | 33.3(7) |
| C(19') | 8643(5)  | 4282.5(16) | 9273(4)  | 35.5(7) |

---



**Table S8:** Bond lengths [Å] and angles [°].

---

|                  |           |                   |          |
|------------------|-----------|-------------------|----------|
| S(1)-C(18)       | 1.720(4)  | S(1')-C(18')      | 1.728(4) |
| S(1)-C(19)       | 1.748(4)  | S(1')-C(19')      | 1.743(4) |
| S(2)-C(19)       | 1.631(4)  | S(2')-C(19')      | 1.644(4) |
| S(3)-C(19)       | 1.730(4)  | S(3')-C(19')      | 1.728(4) |
| S(3)-C(17)       | 1.747(3)  | S(3')-C(17')      | 1.750(3) |
| C(1)-C(14)       | 1.512(5)  | C(1')-C(14')      | 1.518(5) |
| C(1)-C(2)        | 1.575(5)  | C(1')-C(2')       | 1.577(5) |
| C(2)-C(3)        | 1.521(5)  | C(2')-C(3')       | 1.513(5) |
| C(3)-C(8)        | 1.403(5)  | C(3')-C(8')       | 1.393(5) |
| C(3)-C(4)        | 1.416(4)  | C(3')-C(4')       | 1.412(5) |
| C(4)-C(5)        | 1.398(5)  | C(4')-C(5')       | 1.397(4) |
| C(4)-C(17)       | 1.478(4)  | C(4')-C(17')      | 1.472(5) |
| C(5)-C(6)        | 1.398(4)  | C(5')-C(6')       | 1.396(4) |
| C(6)-C(7)        | 1.402(5)  | C(6')-C(7')       | 1.378(5) |
| C(6)-C(9)        | 1.501(5)  | C(6')-C(9')       | 1.521(4) |
| C(7)-C(8)        | 1.379(5)  | C(7')-C(8')       | 1.386(5) |
| C(9)-C(10)       | 1.589(5)  | C(9')-C(10')      | 1.586(5) |
| C(10)-C(11)      | 1.511(5)  | C(10')-C(11')     | 1.510(5) |
| C(11)-C(16)      | 1.389(5)  | C(11')-C(12')     | 1.393(5) |
| C(11)-C(12)      | 1.395(5)  | C(11')-C(16')     | 1.405(5) |
| C(12)-C(13)      | 1.398(5)  | C(12')-C(13')     | 1.389(5) |
| C(13)-C(14)      | 1.394(5)  | C(13')-C(14')     | 1.394(5) |
| C(14)-C(15)      | 1.390(5)  | C(14')-C(15')     | 1.413(5) |
| C(15)-C(16)      | 1.395(5)  | C(15')-C(16')     | 1.382(5) |
| C(17)-C(18)      | 1.340(5)  | C(17')-C(18')     | 1.346(5) |
| <hr/>            |           |                   |          |
| C(18)-S(1)-C(19) | 97.40(17) | C(5)-C(6)-C(7)    | 116.6(3) |
| C(19)-S(3)-C(17) | 99.21(16) | C(5)-C(6)-C(9)    | 120.6(3) |
| C(14)-C(1)-C(2)  | 113.0(3)  | C(7)-C(6)-C(9)    | 121.7(3) |
| C(3)-C(2)-C(1)   | 113.0(3)  | C(8)-C(7)-C(6)    | 120.6(3) |
| C(8)-C(3)-C(4)   | 116.2(3)  | C(7)-C(8)-C(3)    | 122.0(3) |
| C(8)-C(3)-C(2)   | 118.1(3)  | C(6)-C(9)-C(10)   | 113.1(3) |
| C(4)-C(3)-C(2)   | 123.6(3)  | C(11)-C(10)-C(9)  | 112.9(3) |
| C(5)-C(4)-C(3)   | 120.0(3)  | C(16)-C(11)-C(12) | 117.9(3) |
| C(5)-C(4)-C(17)  | 117.2(3)  | C(16)-C(11)-C(10) | 120.5(3) |
| C(3)-C(4)-C(17)  | 122.4(3)  | C(12)-C(11)-C(10) | 120.3(3) |
| C(4)-C(5)-C(6)   | 121.5(3)  | C(11)-C(12)-C(13) | 119.8(3) |

|                     |            |                      |          |
|---------------------|------------|----------------------|----------|
| C(14)-C(13)-C(12)   | 120.9(3)   | C(7')-C(6')-C(5')    | 117.2(3) |
| C(15)-C(14)-C(13)   | 117.3(3)   | C(7')-C(6')-C(9')    | 121.1(3) |
| C(15)-C(14)-C(1)    | 119.7(3)   | C(5')-C(6')-C(9')    | 120.6(3) |
| C(13)-C(14)-C(1)    | 121.6(3)   | C(6')-C(7')-C(8')    | 120.2(3) |
| C(14)-C(15)-C(16)   | 120.6(3)   | C(7')-C(8')-C(3')    | 121.9(3) |
| C(11)-C(16)-C(15)   | 120.5(3)   | C(6')-C(9')-C(10')   | 112.6(3) |
| C(18)-C(17)-C(4)    | 126.0(3)   | C(11')-C(10')-C(9')  | 112.9(3) |
| C(18)-C(17)-S(3)    | 113.6(3)   | C(12')-C(11')-C(16') | 116.8(3) |
| C(4)-C(17)-S(3)     | 120.2(2)   | C(12')-C(11')-C(10') | 120.8(3) |
| C(17)-C(18)-S(1)    | 118.7(3)   | C(16')-C(11')-C(10') | 121.0(3) |
| S(2)-C(19)-S(3)     | 124.7(2)   | C(13')-C(12')-C(11') | 121.6(3) |
| S(2)-C(19)-S(1)     | 124.2(2)   | C(12')-C(13')-C(14') | 120.1(3) |
| S(3)-C(19)-S(1)     | 111.08(19) | C(13')-C(14')-C(15') | 116.9(3) |
| C(18')-S(1')-C(19') | 97.54(17)  | C(13')-C(14')-C(1')  | 122.2(3) |
| C(19')-S(3')-C(17') | 98.52(17)  | C(15')-C(14')-C(1')  | 119.6(3) |
| C(14')-C(1')-C(2')  | 112.0(3)   | C(16')-C(15')-C(14') | 121.0(3) |
| C(3')-C(2')-C(1')   | 113.2(3)   | C(15')-C(16')-C(11') | 120.3(3) |
| C(8')-C(3')-C(4')   | 116.4(3)   | C(18')-C(17')-C(4')  | 126.3(3) |
| C(8')-C(3')-C(2')   | 117.7(3)   | C(18')-C(17')-S(3')  | 114.5(3) |
| C(4')-C(3')-C(2')   | 124.1(3)   | C(4')-C(17')-S(3')   | 119.1(2) |
| C(5')-C(4')-C(3')   | 119.2(3)   | C(17')-C(18')-S(1')  | 117.6(3) |
| C(5')-C(4')-C(17')  | 119.4(3)   | S(2')-C(19')-S(3')   | 124.3(2) |
| C(3')-C(4')-C(17')  | 121.0(3)   | S(2')-C(19')-S(1')   | 124.0(2) |
| C(6')-C(5')-C(4')   | 121.6(3)   | S(3')-C(19')-S(1')   | 111.7(2) |

---

**Table S9:** Torsion angles [°].

|                         |           |                             |           |
|-------------------------|-----------|-----------------------------|-----------|
| C(14)-C(1)-C(2)-C(3)    | -17.2(5)  | C(19)-S(3)-C(17)-C(18)      | 0.5(3)    |
| C(1)-C(2)-C(3)-C(8)     | 95.1(4)   | C(19)-S(3)-C(17)-C(4)       | -175.4(3) |
| C(1)-C(2)-C(3)-C(4)     | -68.0(4)  | C(4)-C(17)-C(18)-S(1)       | 175.7(3)  |
| C(8)-C(3)-C(4)-C(5)     | -12.7(4)  | S(3)-C(17)-C(18)-S(1)       | 0.1(4)    |
| C(2)-C(3)-C(4)-C(5)     | 150.7(3)  | C(19)-S(1)-C(18)-C(17)      | -0.6(3)   |
| C(8)-C(3)-C(4)-C(17)    | 175.1(3)  | C(17)-S(3)-C(19)-S(2)       | 177.6(2)  |
| C(2)-C(3)-C(4)-C(17)    | -21.5(5)  | C(17)-S(3)-C(19)-S(1)       | -0.8(2)   |
| C(3)-C(4)-C(5)-C(6)     | -1.6(5)   | C(18)-S(1)-C(19)-S(2)       | -177.6(2) |
| C(17)-C(4)-C(5)-C(6)    | 171.1(3)  | C(18)-S(1)-C(19)-S(3)       | 0.9(2)    |
| C(4)-C(5)-C(6)-C(7)     | 15.4(4)   | C(14')-C(1')-C(2')-C(3')    | 23.1(4)   |
| C(4)-C(5)-C(6)-C(9)     | -152.7(3) | C(1')-C(2')-C(3')-C(8')     | -98.6(4)  |
| C(5)-C(6)-C(7)-C(8)     | -14.9(5)  | C(1')-C(2')-C(3')-C(4')     | 65.5(4)   |
| C(9)-C(6)-C(7)-C(8)     | 153.0(3)  | C(8')-C(3')-C(4')-C(5')     | 15.7(5)   |
| C(6)-C(7)-C(8)-C(3)     | 0.5(5)    | C(2')-C(3')-C(4')-C(5')     | -148.7(3) |
| C(4)-C(3)-C(8)-C(7)     | 13.3(5)   | C(8')-C(3')-C(4')-C(17')    | -171.3(3) |
| C(2)-C(3)-C(8)-C(7)     | -151.0(3) | C(2')-C(3')-C(4')-C(17')    | 24.3(5)   |
| C(5)-C(6)-C(9)-C(10)    | 87.8(4)   | C(3')-C(4')-C(5')-C(6')     | -1.3(5)   |
| C(7)-C(6)-C(9)-C(10)    | -79.7(4)  | C(17')-C(4')-C(5')-C(6')    | -174.5(3) |
| C(6)-C(9)-C(10)-C(11)   | -6.0(4)   | C(4')-C(5')-C(6')-C(7')     | -14.1(5)  |
| C(9)-C(10)-C(11)-C(16)  | -80.3(4)  | C(4')-C(5')-C(6')-C(9')     | 154.1(3)  |
| C(9)-C(10)-C(11)-C(12)  | 86.7(4)   | C(5')-C(6')-C(7')-C(8')     | 14.8(5)   |
| C(16)-C(11)-C(12)-C(13) | 14.2(5)   | C(9')-C(6')-C(7')-C(8')     | -153.3(3) |
| C(10)-C(11)-C(12)-C(13) | -153.1(3) | C(6')-C(7')-C(8')-C(3')     | -0.2(5)   |
| C(11)-C(12)-C(13)-C(14) | -0.2(5)   | C(4')-C(3')-C(8')-C(7')     | -15.2(5)  |
| C(12)-C(13)-C(14)-C(15) | -13.9(5)  | C(2')-C(3')-C(8')-C(7')     | 150.2(3)  |
| C(12)-C(13)-C(14)-C(1)  | 152.5(3)  | C(7')-C(6')-C(9')-C(10')    | 73.2(4)   |
| C(2)-C(1)-C(14)-C(15)   | 96.0(4)   | C(5')-C(6')-C(9')-C(10')    | -94.5(4)  |
| C(2)-C(1)-C(14)-C(13)   | -70.0(4)  | C(6')-C(9')-C(10')-C(11')   | 14.3(5)   |
| C(13)-C(14)-C(15)-C(16) | 13.9(5)   | C(9')-C(10')-C(11')-C(12')  | -94.0(4)  |
| C(1)-C(14)-C(15)-C(16)  | -152.7(3) | C(9')-C(10')-C(11')-C(16')  | 72.4(4)   |
| C(12)-C(11)-C(16)-C(15) | -14.3(5)  | C(16')-C(11')-C(12')-C(13') | -15.1(5)  |
| C(10)-C(11)-C(16)-C(15) | 153.1(3)  | C(10')-C(11')-C(12')-C(13') | 151.8(3)  |
| C(14)-C(15)-C(16)-C(11) | 0.1(5)    | C(11')-C(12')-C(13')-C(14') | 0.3(5)    |
| C(5)-C(4)-C(17)-C(18)   | -33.6(5)  | C(12')-C(13')-C(14')-C(15') | 14.7(5)   |
| C(3)-C(4)-C(17)-C(18)   | 138.8(4)  | C(12')-C(13')-C(14')-C(1')  | -152.1(3) |
| C(5)-C(4)-C(17)-S(3)    | 141.7(3)  | C(2')-C(1')-C(14')-C(13')   | 67.6(4)   |
| C(3)-C(4)-C(17)-S(3)    | -45.9(4)  | C(2')-C(1')-C(14')-C(15')   | -98.8(4)  |

|                             |           |
|-----------------------------|-----------|
| C(13')-C(14')-C(15')-C(16') | -15.0(5)  |
| C(1')-C(14')-C(15')-C(16')  | 152.2(3)  |
| C(14')-C(15')-C(16')-C(11') | 0.2(5)    |
| C(12')-C(11')-C(16')-C(15') | 14.7(5)   |
| C(10')-C(11')-C(16')-C(15') | -152.1(3) |
| C(5')-C(4')-C(17')-C(18')   | -148.0(3) |
| C(3')-C(4')-C(17')-C(18')   | 39.0(5)   |
| C(5')-C(4')-C(17')-S(3')    | 30.6(4)   |
| C(3')-C(4')-C(17')-S(3')    | -142.4(3) |
| C(19')-S(3')-C(17')-C(18')  | 1.6(3)    |
| C(19')-S(3')-C(17')-C(4')   | -177.2(3) |
| C(4')-C(17')-C(18')-S(1')   | 179.6(3)  |
| S(3')-C(17')-C(18')-S(1')   | 0.9(4)    |
| C(19')-S(1')-C(18')-C(17')  | -2.9(3)   |
| C(17')-S(3')-C(19')-S(2')   | 177.7(2)  |
| C(17')-S(3')-C(19')-S(1')   | -3.4(2)   |
| C(18')-S(1')-C(19')-S(2')   | -177.3(2) |
| C(18')-S(1')-C(19')-S(3')   | 3.8(2)    |
